# Supplementary material
Source: MDPI journal article supplement (https://www.mdpi.com/2624-8611/1/1/2)
Supplement: s1 [file s1]

## Sheet: Sheet1
Prefecture	2018bA	2018bB	2018mA	2018mB	2018s	2018ebA	2018ebB	2018emA	2018emB	2018es	2017bA	2017bB	2017mA	2017mB	2017ebA	2017ebB	2017emA	2017emB	2016bA	2016bB	2016mA	2016mB	2016ebA	2016ebB	2016emA	2016emB	2015vA	2015vB	2015mA	2015mB	2015s	2015evA	2015evB	2015emA	2015emB	2015es	2014vA	2014vB	2014mA	2014mB	2014evA	2014evB	2014emA	2014emB	2013vA	2013vB	2013mA	2013mB	2013evA
Hokkaido	77	61	65	46	67	70	53	62	49	59	77	72	64	47	74	56	77	44	75	65	62	43	71	56	75	45	75.8	65.7	63	39.7	53.3	68.1	63	72.3	42.5	59.3	79.4	49.9	66	59.4	71.8	52.9	75.8	55.2	76	66.2	62.3	39.1	60.4
Aomori	77	61	67	46	68	75	57	65	53	62	78	73	66	48	79	59	80	48	76	66	64	45	77	60	80	48	76	64.8	64.4	39.8	53.8	75.1	69.8	78.5	47.4	66.3	81	52	69.3	60.7	76.6	60.5	81.3	60.8	78.8	67.7	65	42.4	68.7
Iwate	76	61	62	43	65	74	57	63	51	61	78	72	60	45	77	60	81	45	76	66	58	41	73	60	78	47	75.5	64.8	60.1	36.7	50.7	73.1	67.9	75.6	42.8	61.6	80.5	51.8	64.1	57.5	73.7	58.3	78.9	58.7	78.2	68.1	59.9	37.4	65.5
Miyagi	77	62	65	47	67	69	53	62	49	59	77	73	63	47	74	56	77	44	77	68	60	44	72	56	77	46	76.1	66.2	63.1	40.7	53.7	69.6	63.9	74.1	42.7	59.6	80.3	52	65.6	59.4	74.2	54.3	77.3	56.8	77.6	68.6	62.2	39.7	60.8
Akita	80	66	70	51	70	77	61	67	57	66	82	78	68	52	80	64	84	50	79	72	67	48	77	64	82	52	80.8	70.7	68.4	46.9	59.6	76	76.4	81.2	51.5	66.7	84.4	55.8	73	65.5	77.4	67.3	85.1	66.2	81.9	74.6	68.9	47.5	71.7
Yamagata	77	61	65	46	68	71	54	63	51	62	78	72	63	46	76	55	77	44	77	67	61	43	72	58	76	46	76.8	66.3	63.4	40.3	54.9	70.6	63.6	73.4	42.1	62	80.6	52.1	67.6	60.2	74.3	56.7	77.8	57.7	78.9	69.1	63.1	40.7	63.9
Fukushima	76	61	64	44	66	72	54	64	51	60	78	72	63	47	76	57	81	45	76	65	59	41	73	57	77	46	75.2	64.5	61.2	38.1	52.5	71	65.3	74.3	42.4	60.7	79.4	50.5	64.7	56.8	73.3	57	78.7	57.8	77.3	66.4	61	38.1	63.9
Ibaraki	77	62	66	47	68	71	56	65	52	63	78	74	65	48	76	59	81	47	77	69	61	45	74	59	78	48	76.4	67.5	63.1	41.4	54.9	71.2	67.2	75.4	45.1	64.2	79.9	52.3	66.5	57.8	76.9	57.4	79.7	58.6	77.2	69.5	62.9	42.1	63.7
Tochigi	76	61	65	46	67	71	55	63	51	61	77	73	64	48	75	57	79	45	76	67	61	43	71	56	75	45	75.7	65.2	63.5	40.4	53.1	68.9	63.1	73.9	43	60	79.3	51.4	66.9	59.3	71.9	54.5	77.7	56.8	77.2	68	63.8	41.1	61.1
Gumma	77	63	67	48	69	71	54	62	50	61	79	75	65	50	75	57	78	44	77	69	63	46	72	57	78	46	77	67.4	65.3	42.6	57	71.1	64.2	74.9	43.2	61.7	81.1	54.2	69.2	62.6	73.6	55.5	78	57.8	78.1	68.8	64.9	42.8	61.3
Saitama	75	61	65	47	65	71	54	62	50	59	76	72	63	48	75	57	76	45	75	66	60	43	72	57	76	46	74.9	64.7	63.2	40.4	51.6	68.7	64.2	73.1	43.1	59.2	79.4	51.5	66.2	59.3	72.5	55.5	76.9	57.8	76.5	68.8	62.8	40.6	62.6
Chiba	76	61	64	46	65	70	53	62	51	61	76	72	63	47	75	57	77	46	76	67	60	43	73	58	77	47	76	65.7	63.4	41.6	52	71.5	64.5	74.7	45.1	61.9	79.8	51.7	66.7	60.1	75.8	55.5	78.2	58.8	76.2	68.1	63.2	41.5	61.9
Tokyo	77	63	67	49	65	74	57	67	55	62	79	74	66	50	76	60	81	49	77	69	64	46	74	60	79	50	77.2	67	66.3	44	52.5	72.3	66.5	77.4	47.8	62.4	80.7	53.2	68.8	61.8	75.5	57.2	79.4	61.2	77.3	69.3	65.2	43.2	64.8
Kanagawa	76	62	66	48	66	70	54	64	52	60	77	72	64	48	73	57	77	46	75	67	62	44	70	58	77	47	76	66.5	65	43.3	52.8	67.9	64.3	74	44.8	60.4	79.2	51.5	67	60.8	71.3	54.6	76.9	58.6	76.3	68.9	63.8	41.9	61.5
Niigata	77	62	67	47	66	72	57	66	51	60	77	73	66	48	77	59	80	46	77	67	62	44	76	60	80	48	76	66	64.4	42.2	52.1	73.2	67.2	77.4	44.9	63.1	79.5	50.3	67.9	59.8	74.5	58.8	80	59.4	76.5	66.6	62.7	39.2	66.3
Toyama	78	63	70	51	70	74	58	66	55	64	80	75	68	50	78	60	82	47	78	71	65	49	75	61	81	51	78.1	68.2	67.1	44.5	59.2	72.9	70.1	78.5	47.5	67.5	82.3	55.1	71.1	63.6	74.1	59.5	81	62	78.9	70.4	65.8	43.9	63.8
Ishikawa	79	65	71	52	71	76	61	68	59	66	82	77	69	53	79	64	85	53	78	71	66	49	79	63	82	54	78.1	69.1	67.8	44.9	58.2	74.4	73.5	80.3	50.4	66.7	81.9	53.7	70.9	63.4	74.1	62.7	82.5	63.6	78.3	70.7	66.6	45	67.6
Fukui	79	64	72	53	71	76	57	66	56	64	82	77	73	54	78	60	82	51	78	70	69	51	77	63	82	52	79.5	69.8	71.1	47.7	61.3	73.8	72.1	79.2	50	66.8	83	55.9	74.3	66.9	74.6	61.8	83.1	64.1	80	71.7	69.9	49.2	68.6
Yamanashi	76	62	66	48	67	71	54	62	50	60	79	74	64	49	74	56	77	43	75	68	61	44	71	58	77	47	76.1	66.2	63.6	41.2	54.1	68.5	64.8	74.1	41.9	60.4	80	52	66.6	59.7	70.1	55	77	57.6	76.9	67.4	62.1	40	60.1
Nagano	76	61	65	46	66	72	55	62	50	61	78	72	64	48	75	57	78	46	76	66	61	44	74	59	77	47	76.2	65	63.5	40.6	52.8	70.4	66.4	75	45.4	61.3	79.7	49.4	67.2	58.1	72.6	57	79.1	59	76.8	65.9	61.9	40.2	63.7
Gifu	76	62	67	49	68	72	56	63	51	61	79	74	66	50	74	58	77	45	76	69	64	46	73	59	77	47	76.4	68.3	65.7	44.2	56.8	67.8	65.9	73.8	43.6	60.8	79.8	52	69.8	61.3	70.2	54.8	76.9	56.9	77.1	70.2	66.6	45.7	61.3
Shizuoka	78	63	68	49	68	69	56	63	51	60	78	74	67	50	74	59	78	46	77	70	64	47	77	59	79	47	76.3	67.7	66	44.6	55.3	71.7	67.8	77.2	45.3	60.2	80.8	52.5	70.9	63.7	72.8	58.4	79.4	58.5	77.1	68.7	65	44.6	57.7
Aichi	76	61	69	49	68	68	52	61	50	58	78	73	67	50	73	55	76	46	76	66	65	47	71	56	76	46	76.4	66.3	67.2	43.8	56.1	66.6	63	73.4	45.7	59.3	79.2	51.5	69.7	62.5	70.5	52.4	75.8	57.4	76.3	67.1	66.3	44.5	61.2
Mie	75	60	67	46	66	70	54	63	50	59	77	71	65	47	74	57	77	45	74	64	62	43	72	58	78	47	75	64.3	64.3	40.6	51.9	68	65.3	74.8	44.1	59.2	78	49	67.1	58.3	69.6	52.5	76.2	56	75	65.8	63.2	39.3	60.3
Shiga	75	58	65	45	64	68	53	60	49	58	76	69	63	47	73	56	76	43	74	63	61	42	73	57	76	46	74.1	63.8	63.8	39.2	50.3	68.6	63.7	72.7	43	58	77.9	48.8	66.5	56.3	71	52.7	75.6	55.3	75.5	65.6	64.4	40.4	58.8
Kyoto	77	62	67	48	66	73	56	65	53	62	78	73	66	49	76	59	80	48	76	67	63	45	74	59	80	49	76.7	66.5	65.3	42.5	52.6	72.1	67.5	77.6	47.5	62.2	79.4	51.3	67.7	60.1	73.3	56.9	79.9	59.7	76.3	68.2	64.2	42.9	65.8
Osaka	75	59	65	46	64	68	52	63	51	57	75	69	64	46	72	54	78	45	74	63	62	43	71	55	77	46	74.4	64.8	64.3	41.4	50.8	67.6	62.7	74.8	44.1	57.3	77	47.2	65	56.9	70.7	52.6	77.3	56.3	73.3	63	61.7	38.8	61.2
Hyogo	77	61	69	48	67	70	54	63	52	59	78	72	68	50	75	57	78	46	76	66	66	46	73	58	78	47	77.1	65.9	67.1	42.8	53.3	70.1	65.5	75.2	46.9	60.3	79.9	51.1	69.6	61.3	72.9	54.6	77.7	58.4	76.8	67	65.9	43.8	63.3
Nara	76	60	66	46	64	69	53	63	50	59	78	72	65	48	74	56	78	45	76	66	64	44	72	57	77	46	76.2	65.1	65.3	41.7	51.5	70.5	64.7	75.5	44.8	60	79	50.8	68.5	60.5	73.2	53.5	78.6	57.7	77.1	67.5	65.5	42.9	62.6
Wakayama	75	59	67	45	65	72	55	63	51	60	77	70	65	48	75	57	79	46	74	63	62	43	70	56	77	46	73.4	62.9	64	39.6	50.1	69.5	64.5	75.6	44.9	59	77.4	47.5	65.9	56.8	69.4	53.4	76.8	55.7	74.4	64.3	63.4	40.3	62.4
Tottori	76	60	66	45	66	71	55	62	50	60	77	72	63	48	76	57	77	46	77	67	63	44	75	58	77	47	76.9	66.2	64.3	41.2	53	71.5	66.8	74.6	45.2	60.1	79.5	51.2	67.4	59.7	77	56.5	78.6	58.1	77.6	68.6	64.8	43	63.9
Shimane	76	61	64	45	66	68	55	61	49	58	77	72	62	46	75	58	77	43	76	68	60	42	75	57	77	46	75.7	65.6	62.7	39.6	53.1	69.3	63.8	72.4	42.2	59.8	80.2	52	66.1	59.1	73.6	54.5	76.3	56.5	77.2	69.1	62.9	40.8	59.9
Okayama	76	59	65	44	66	71	54	62	50	60	77	71	64	47	75	58	79	46	75	64	60	41	73	58	77	47	74.8	63.5	62.9	38.3	51.5	69.2	64.5	75.2	44.8	59.9	78.2	48.1	65.4	55.9	71.4	54.5	77.8	56.6	76.4	66.4	62.8	40.3	61.4
Hiroshima	76	61	66	46	66	73	59	66	54	63	78	73	64	48	77	61	81	47	77	68	62	45	78	61	80	50	76.5	67	64.6	42.7	52.2	73.8	69.7	77.7	46.7	63.2	80.1	50.9	68.4	60.5	75.9	58.3	80.7	60.1	76.7	69.2	64.8	43.5	65.8
Yamaguchi	77	61	67	46	67	72	57	64	52	62	79	73	66	49	76	58	79	45	77	68	64	45	75	59	78	48	76.4	66.3	65.3	42.4	53	72.1	67.5	77.1	46.4	62.7	80.7	52.4	70.3	62.6	73.6	57.8	79.5	58.6	77.3	68.3	65.5	44.2	64.3
Tokushima	77	60	69	47	67	70	54	61	50	59	78	71	67	49	75	56	79	46	76	64	65	44	76	57	77	45	75.7	64.3	65.4	39.9	52.4	68.5	66.1	74.6	45.5	59.7	79.3	49.8	68.5	58.1	70.1	53.8	76.9	55.8	76.5	64.9	65.4	42.6	63.3
Kagawa	76	60	67	46	66	69	58	64	53	60	78	71	66	49	75	59	79	48	77	68	64	45	75	60	78	47	76	64.9	64.4	41.3	53.2	72.3	69.5	74.3	47	62.3	79.3	51.4	67.8	60	75.5	58.8	78.5	59.5	76.6	67	66.3	44.6	66.8
Ehime	77	62	69	49	68	72	55	65	54	61	79	74	67	51	77	59	82	50	77	69	64	47	74	61	81	49	77	66.5	65.4	43.2	55.2	69.9	67.7	75.1	47.9	63.9	80.3	52.8	68.7	62.9	72.6	57.2	77.9	57.6	76.5	67.2	64.5	44	63.1
Kochi	75	60	64	43	64	70	55	65	53	60	76	69	62	45	75	57	82	46	75	65	59	40	77	58	80	47	73.3	62.9	59.9	36.2	47.3	73.4	67	77	44.6	60.3	77.2	47.7	62.7	53.6	74.4	55	79.2	57.9	74.3	64.8	59.3	35.4	65.3
Fukuoka	75	61	65	46	65	71	55	63	51	61	77	71	63	46	76	58	79	46	75	66	60	42	72	58	78	47	74.6	64.5	62.2	39.8	51.3	69.8	65.1	74.7	44.2	59.5	78.4	49.6	65.6	57.8	72	54.4	77.7	57.4	75.4	66.5	62	39.8	63.2
Saga	75	59	64	44	64	71	54	63	51	61	77	70	62	46	75	56	80	44	75	65	59	41	73	57	78	46	73.9	63.3	61.7	38.6	49.6	70.4	64.6	74.6	43.7	61	78	48.8	64	56.5	73.5	54.6	77.6	57.3	75.3	65.8	61.7	39.5	63.3
Nagasaki	75	60	65	45	66	69	54	62	50	60	77	72	64	48	73	56	78	43	75	67	62	43	72	57	78	47	75.5	66	64.1	40.3	51.6	69	64.1	74	43.5	58.8	79	49.8	66.9	59.2	71.9	53.5	78	57.2	76.1	66.6	63.2	41.3	60.3
Kumamoto	75	59	65	46	66	71	56	64	51	62	77	71	63	47	76	57	80	46	na	na	na	na	na	na	na	na	75.2	66.2	64	41.6	54.4	70.2	64	75.5	45.6	62.6	79	51.3	67.4	61.6	71.6	54.8	79.3	58.5	76.6	67.1	63.4	43	64
Oita	77	62	66	45	67	72	56	65	52	63	79	73	64	47	76	58	81	46	75	66	61	42	73	58	78	47	75.9	65.6	63	39.4	52.9	71.5	66.7	76.7	44.6	62.8	79.8	50.2	66.6	57.4	73.6	57.2	79.8	58.4	76	66.7	62	39.2	62.3
Miyazaki	75	59	66	44	65	71	54	62	50	60	78	71	65	47	76	55	79	44	75	65	62	43	75	56	77	46	74	64.7	63.8	40	51.1	72.1	64	73.7	43.7	60	78.4	50.2	68.4	59.9	73.7	53.8	77.9	55.9	76.1	66.4	64	41.4	64.5
Kagoshima	75	58	64	45	65	70	53	64	49	59	75	70	61	46	75	55	79	45	74	64	60	41	72	57	79	45	73.3	64.1	61.7	39.4	51.9	68.4	65.8	75.9	42.5	63.4	78.1	49.1	65.5	58.4	72.5	55.2	78.5	55.3	75.4	64.8	61.5	39.2	64.7
Okinawa	72	58	59	40	61	68	56	66	52	61	72	67	58	42	73	57	81	46	71	63	54	37	73	58	81	48	70	61.3	55.8	34	45.9	69.3	67.3	77.7	44.7	59	74.4	45.6	58.2	50.3	72	54.5	80.9	57.1	69.2	62.4	53.2	29.8	58.3
average	76.2553	61.0213	66.1702	46.5532	66.4255	71.1702	55.2128	63.5532	51.5319	60.7234	77.7234	72.3404	64.6383	48.0638	75.383	57.6596	79.1277	45.9574	75.8913	66.7391	62.1304	44	73.6304	58.3478	78.1087	47.3261	75.8319	65.7404	64.1511	41.1766	53.1574	70.6702	66.2298	75.5043	45.0277	61.4277	79.5681	51.0404	67.4085	59.6574	73.134	56.1319	78.5894	58.2596	76.6596	67.5319	63.6489	41.4979	63.2106
SD(prefecture)	1.31227	1.68206	2.27212	2.38621	1.91016	2.14693	2.00993	1.78419	2.14229	1.89851	1.72222	2.07597	2.47047	2.09766	1.67018	2.04499	2.07945	2.0624	1.38671	2.2208	2.5927	2.55377	2.17054	1.95845	1.78433	1.92302	1.66364	1.77951	2.38398	2.54769	2.84304	2.14485	2.80652	1.98804	2.18921	2.41085	1.60068	2.0989	2.62863	2.90354	1.98669	2.90195	1.91913	2.24894	1.80974	2.16265	2.57011	3.10822	2.77406
Full score	32	9	36	14	27	12	8	14	10	16	32	9	36	15	15	9	15	11	33	9	36	15	15	10	16	13	33	9	36	15	25	14	9	16	13	24	32	9	36	15	15	10	17	13	32	9	36	16	18
SD(individual)	5.4	2	8.1	3.5	5.2	2.7	1.9	3.2	2.7	3.2	5.7	2.3	8.5	3.3	2.8	2.2	3.1	2.6	5.4	2.3	8.3	3.6	3.1	2.4	3.4	2.8	6	2	8	3.8	5.7	2.8	2.4	3.4	3	5	5.7	2.3	8.2	3.9	3.1	2.4	3.2	3.3	5.7	2.3	8	4.1	3.7
SD Akita	4.4	1.8	7.4	3.3	4.6	2.4	1.9	2.9	2.5	3	4.7	1.9	7.8	3.1	2.3	2	2.6	2.5	4.5	2	7.5	3.3	2.8	2.3	2.9	2.7	5	1.7	7.2	3.6	5.3	2.5	2.1	2.9	2.8	4.5	4.7	2.2	7.5	3.4	2.6	2.2	2.6	3	4.6	2	7.4	3.9	3.2
N Akita	7364	7365	7368	7367	7366	7255	7253	7255	7253	7254	7656	7656	7654	7651	7183	7182	7183	7180	7831	7828	7831	7828	7435	7431	7434	7431	8166	8163	8165	8162	8160	7669	7668	7669	7667	7667	8487	8486	8483	8487	7838	7836	7838	7837	8720	8718	8716	8716	8178
SD Okinawa	5.7	2	8.4	3.3	5.1	2.6	2	3	2.6	3.1	6.1	2.4	8.7	3	2.8	2.1	2.9	2.6	5.7	2.3	8.2	3.3	3.2	2.4	3.1	2.7	6.3	2	7.9	3.3	5.4	2.8	2.3	3.2	2.9	4.9	6.3	2.2	8.5	3.7	3.1	2.4	2.9	3.3	6.1	2.4	7.9	3.4	3.8
N. Okinawa	14063	14060	14064	14059	14066	15162	15157	15163	15158	15165	14418	14413	14413	14411	14571	14564	14570	14557	14731	14735	14733	14736	15049	15043	15049	15042	14673	14673	14677	14675	14669	15173	15164	15171	15167	15169	14861	14860	14851	14849	15322	15317	15322	15316	15069	15073	15083	15072	15918
SD Fukui	4.7	1.9	7.4	3.4	4.8	2.4	1.9	3.1	2.5	3.1	4.9	2.1	7.5	3.3	2.5	2.1	2.8	2.6	4.7	2.1	7.5	3.6	2.8	2.3	2.9	2.7	5.3	1.8	7.2	3.7	5.5	2.5	2.2	3	2.9	4.6	4.8	2.2	7.4	3.5	2.8	2.3	2.7	3.1	4.9	2.1	7.2	4	3.3
N Fukui	6665	6664	6668	6666	6665	6923	6919	6923	6921	6908	6936	6935	6938	6938	6826	6826	6825	6824	7171	7171	7169	7167	6942	6940	6946	6944	7150	7146	7147	7145	7145	7002	7002	7002	7004	6967	7276	7274	7275	7278	7314	7312	7314	7312	7508	7511	7509	7508	7526
SD Kochi	5.3	2	8.3	3.4	5.1	2.6	2	3.2	2.6	3.2	5.6	2.3	8.5	3.2	2.7	2.2	2.9	2.7	5.1	2.2	8.1	3.3	2.9	2.4	3.1	2.8	6.2	2.1	8	3.5	5.6	2.6	2.3	3.1	3	5	6	2.3	8.4	3.8	2.9	2.4	3	3.3	5.5	2.3	7.8	3.7	3.6
N Kochi	4473	4471	4473	4474	4468	5468	5463	5468	5459	5466	4562	4560	4562	4560	5334	5333	5334	5332	4886	4882	4875	4877	5427	5425	5427	5425	4934	4925	4935	4928	4926	5683	5657	5663	5656	5657	4971	4963	4965	4965	5847	5844	5847	5844	4929	4919	4917	4919	6196
N all	1007595	1007651	1007851	1007783	1008081	1043413	1043185	1043401	1043230	1043215	1023860	1023987	1,024,189	1024165	1012542	1012360	1012581	1012313	1037709	1037896	1038044	1038129	1034949	1034679	1034954	1034684	1056612	1056743	1056921	1056741	1056754	1074670	1074500	1074707	1074467	1074194	1059584	1059784	1059966	1060010	1093806	1093582	1093799	1093581	1070187	1070437	1070833	1070792	1121137
"vA" denotes basic verbal test for high school students
vB for advanced verbal test
mA for basic math test
mB for advanced math test
s for science test
evA for basic verbal test for 11 year old ememetary school students
evB for advanced verbal test for 11 year old elementary shool students
emA for basic math test for 11 year old elementary school students
emB for advanced math test for 11 year old elementary school students
es for science test for 11 year old elementary school students
average is prefectural average of the test score
SD(prefecture) is the standard deviation at the prefectural level
g loading is the g lodaings of tests
Full score is full mark for each test
SD(individual) all is the nationwide standard deviation of a test
SD is the standard deviation of a test in a prefecture
N. is the number of test takers in a prefecture
N all is the total number of the test takers
[truncated: 45 more columns]
